# Supplementary material for: Beekeeping and Managed Bee Diversity in Indonesia: Perspective and Preference of Beekeepers
Source: MDPI journal article supplement (doi:10.3390/d14010052), 2022-01-13
Supplement: s1 [file s1]

Table S1. Questionnaire for direct interview and online questionnaire

| No  | Variable                                                                                                              | Direct interview | Online questionnaire |
|-----|-----------------------------------------------------------------------------------------------------------------------|------------------|----------------------|
| 1.  | Name of beekeeper                                                                                                     | √                | √                    |
| 2.  | Gender                                                                                                                | √                | √                    |
| 3.  | Address                                                                                                               | √                | √                    |
| 4.  | Email                                                                                                                 | √                | √                    |
| 5.  | Phone number                                                                                                          | √                | √                    |
| 6.  | Age                                                                                                                   | √                | √                    |
| 7.  | Education                                                                                                             | √                | √                    |
| 8.  | Coordinate and altitude                                                                                               | √                | √                    |
| 9.  | When did you start beekeeping?                                                                                        | √                | √                    |
| 10. | Who teach the beekeeping method?                                                                                      | √                | √                    |
| 11. | What types of bees are cultivated?                                                                                    | √                | √                    |
| 12. | How many boxes of bees (hives) do you have at the beginning?                                                          | √                | √                    |
| 13. | How many boxes of bees do you currently have?                                                                         | √                | √                    |
| 14. | What are the types of land use around where the bees are cultivated?                                                  | √                | √                    |
| 15. | Is there any actual death or loss of individual honey bees or stingless bees?                                         | √                | √                    |
| 16. | If there is a decrease of bee population, how do you know?                                                            | √                | √                    |
| 17. | If there is a decrease of bee population, what percentage is the estimated decrease in bee population?                | √                | √                    |
| 18. | If there is a decrease of bee populations, when is the estimate for the decrease in bee population?                   | √                | √                    |
| 19. | What were the factors that influenced the stingless or honey bee death?                                               | √                | √                    |
| 20. | Are there any obstacles and problems in raising honey bees or stingless bees?                                         | √                | √                    |
| 21. | If there is a pest or bee parasite attack, what are the pests or parasites that attack the bee?                       | √                | √                    |
| 22. | Is there any use of pesticides around the farm?                                                                       | √                | √                    |
| 23. | If there is use of pesticides around the farm, what is the name of the pesticide used? and what plant is it used for? | √                | √                    |
| 24. | If there is use of a pesticide, how many times is it used in a week?                                                  | √                | √                    |
| 25. | Have there been any changes in the types of bees raised in the last 10 years?                                         | √                |                      |
